# Supplementary material for: Preoperative C-reactive protein to albumin ratio may be a good prognostic marker in patients undergoing hepatectomy for hepatocellular carcinoma: a meta-analysis
Source: Frontiers journal article supplement (doi:10.3389/fnut.2024.1444352), 2024-10-01
Supplement: Image_1.pdf [file Image_1.pdf]

**Supplementary Material 3: Publication bias assessment by funnel plot and Egger’s test, sensitivity analyses**

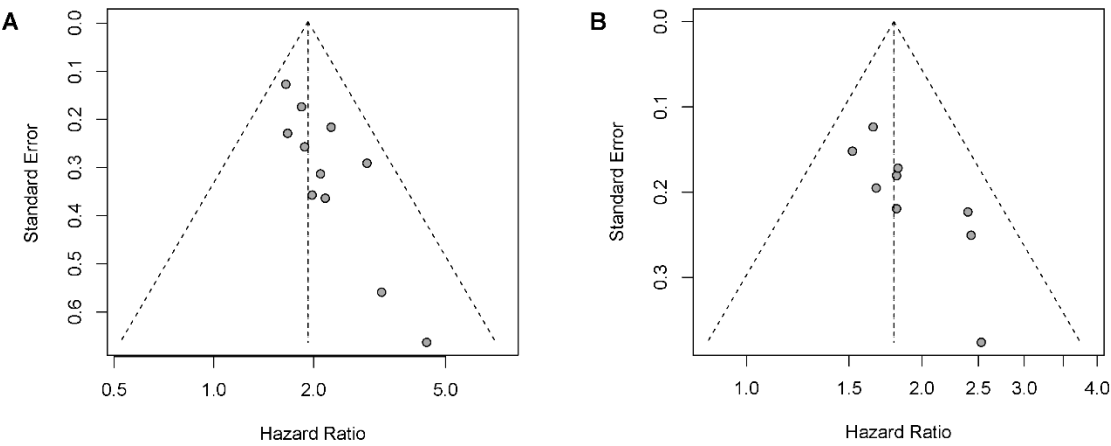

Figure 1: Funnel plot for (A) overall survival, Egger’s test P = 0.0039, (B) disease free survival, Egger’s test P = 0.0115

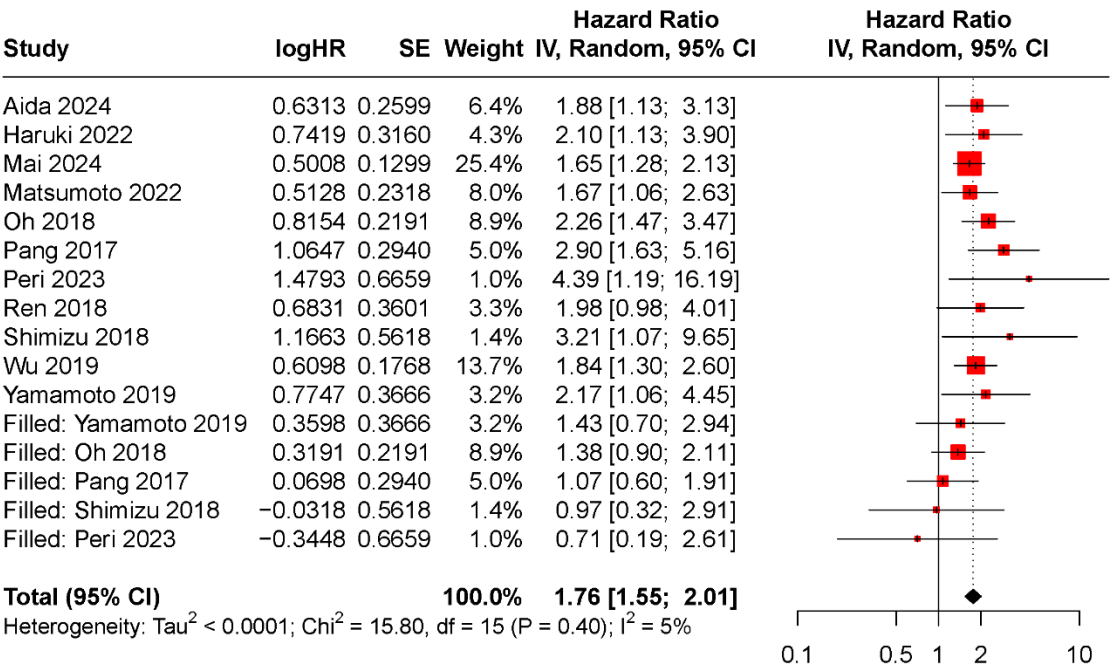

Figure 2: Forest plot for overall survival after trim-and-fill method

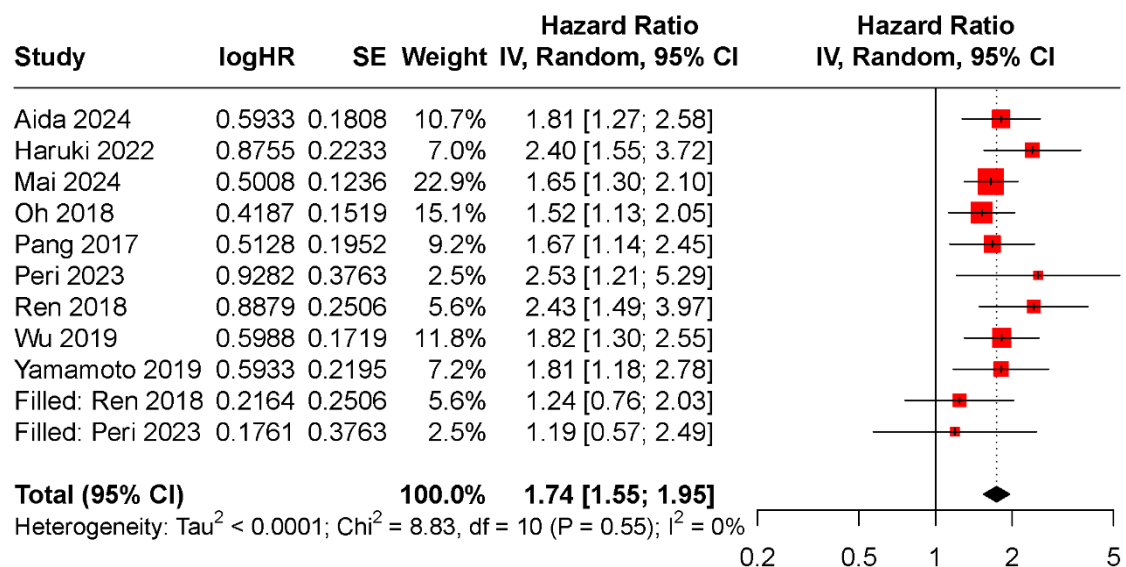

Figure 3: Forest plot for disease free survival after trim-and-fill method

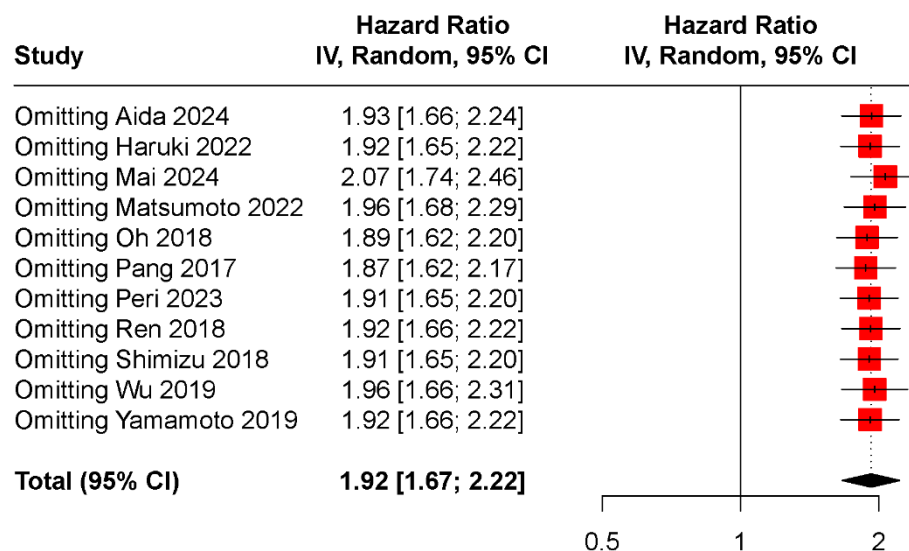

Figure 4: Sensitivity analysis for overall survival

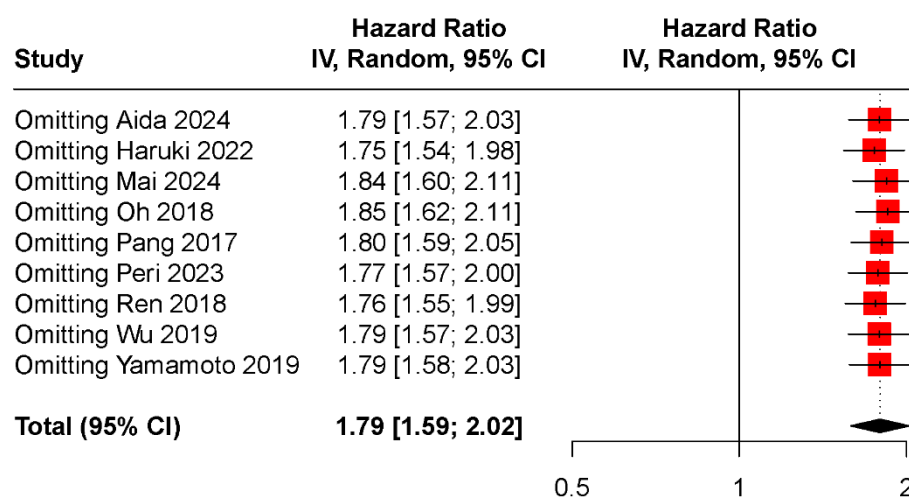

Figure 5: Sensitivity analysis for disease free survival
